RESEARCH ARTICLE

# Development of a new risk model for predicting cardiovascular events among hemodialysis patients: Population-based hemodialysis patients from the Japan Dialysis Outcome and Practice Patterns Study (J-DOPPS)

Yukiko Matsubara<sup>1</sup>✉, Miho Kimachi<sup>2,3</sup>✉, Shingo Fukuma<sup>2,3,4\*</sup>, Yoshihiro Onishi<sup>3</sup>, Shunichi Fukuhara<sup>2,4</sup>

**1** Department of Artificial Organs, Akane-Foundation Omachi Tsuchiya Clinic, and Hiroshima Medical University, Hiroshima, Japan, **2** Department of Healthcare Epidemiology, School of Public Health in the Graduate School of Medicine, Kyoto University, Kyoto, Japan, **3** Institute for Health Outcomes and Process Evaluation Research (iHope International), Kyoto, Japan, **4** Center for Innovative Research for Communities and Clinical Excellence, Fukushima Medical University, Fukushima, Japan

✉ These authors contributed equally to this work.

\* [fukuma.shingo.3m@kyoto-u.ac.jp](mailto:fukuma.shingo.3m@kyoto-u.ac.jp)

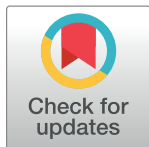

**OPEN ACCESS**

**Citation:** Matsubara Y, Kimachi M, Fukuma S, Onishi Y, Fukuhara S (2017) Development of a new risk model for predicting cardiovascular events among hemodialysis patients: Population-based hemodialysis patients from the Japan Dialysis Outcome and Practice Patterns Study (J-DOPPS). PLoS ONE 12(3): e0173468. doi:10.1371/journal.pone.0173468

**Editor:** Yoshiaki Taniyama, Osaka University Graduate School of Medicine, JAPAN

**Received:** November 25, 2016

**Accepted:** February 22, 2017

**Published:** March 8, 2017

**Copyright:** © 2017 Matsubara et al. This is an open access article distributed under the terms of the [Creative Commons Attribution License](https://creativecommons.org/licenses/by/4.0/), which permits unrestricted use, distribution, and reproduction in any medium, provided the original author and source are credited.

**Data Availability Statement:** The data used for this study cannot be made publicly available even though the minimal data set because they were obtained from a third party (Arbor Research Collaborative for Health) and contain sensitive information, including gender, age, and self-reported socioeconomic data on participants. However, data requests can be sent to Arbor Research via their website (<http://www.arborresearch.org/AboutUs/ContactUs.aspx>).

## Abstract

### Background

Cardiovascular (CV) events are the primary cause of death and becoming bedridden among hemodialysis (HD) patients. The Framingham risk score (FRS) is useful for predicting incidence of CV events in the general population, but is considered to be unsuitable for the prediction of the incidence of CV events in HD patients, given their characteristics due to atypical relationships between conventional risk factors and outcomes. We therefore aimed to develop a new prognostic prediction model for prevention and early detection of CV events among hemodialysis patients.

### Methods

We enrolled 3,601 maintenance HD patients based on their data from the Japan Dialysis Outcomes and Practice Patterns Study (J-DOPPS), phases 3 and 4. We longitudinally assessed the association between several potential candidate predictors and composite CV events in the year after study initiation. Potential candidate predictors included the component factors of FRS and other HD-specific risk factors. We used multivariable logistic regression with backward stepwise selection to develop our new prediction model and generated a calibration plot. Additionally, we performed bootstrapping to assess the internal validity.

**Funding:** The JDOPPS is coordinated by Arbor Research Collaborative for Health and is supported by scientific research grants from Kyowa Hako Kirin without restrictions on publications. The funder had no role in study design, data collection and analysis, decision to publish, or preparation of the manuscript.

**Competing interests:** Shingo Fukuma has acted as a scientific advisor to Kyowa Hako Kirin. Shunichi Fukuhara has acted as both a scientific advisor to, and received grants from Kyowa Hako Kirin. Other authors have no potential competing interests to declare. This does not alter the authors' adherence to all the PLOS ONE policies on sharing data and materials.

## Results

We observed 328 composite CV events during 1-year follow-up. The final prediction model contained six variables: age, diabetes status, history of CV events, dialysis time per session, and serum phosphorus and albumin levels. The new model showed significantly better discrimination than the FRS, in both men (c-statistics: 0.76 for new model, 0.64 for FRS) and women (c-statistics: 0.77 for new model, 0.60 for FRS). Additionally, we confirmed the consistency between the observed results and predicted results using the calibration plot. Further, we found similar discrimination and calibration to the derivation model in the bootstrapping cohort.

## Conclusions

We developed a new risk model consisting of only six predictors. Our new model predicted CV events more accurately than the FRS.

## Introduction

Mortality risk among hemodialysis population remains substantially higher than in the general population [1], despite improvements in HD treatment. Cardiovascular (CV) events are a major cause of death and becoming bedridden among HD patients. The relative risk of death due to CV events in hemodialysis patients is reported to be 10 to 30 times that in the general population [2,3]. However, a useful prognostic prediction model has not been developed yet, even though the international kidney guidelines [4,5] recommend early detection and prevention of CV events among HD patients.

The Framingham risk score (FRS) is the most commonly used model for predicting 10-year incidence of CV events in the general population [6,7], accounting for age, sex, blood pressure, smoking habit, total cholesterol (TC) or low-density lipoprotein cholesterol (LDL-C), high-density lipoprotein cholesterol (HDL-C), and diabetes mellitus status. The FRS is useful for encouraging lifestyle modification and promotes early prevention in the general population [8,9].

However, several characteristics specific to HD patients have rendered the FRS unsuitable for use in this particular population. For example, the FRS strongly weights symptoms such as hypercholesterolemia. In the general population, hypercholesterolemia is associated with an increased risk for CV events, while hypocholesterolemia tends to lead to increased incidence of CV events in HD patients paradoxically [10,11]. Further, the FRS doesn't include any HD-specific risk factors, such as mineral metabolism, including calcium and phosphate levels [12–14], anemia [15], and malnutrition [11,16,17], all of which have been identified as risk factors of CV events. The difference in the degree to which each risk factor contributes to CV events between HD and general populations may also hamper model development [18,19]. These discrepancies in characteristics between general population and HD patients render the FRS inappropriate for use in HD patients.

Given the poor evidence of the utility of the FRS in hemodialysis populations, we developed a new risk model for predicting CV events as an alternative to the FRS, which is more appropriate for use in a general population.

## Materials and methods

### Design, setting, and participants

We used the data from Japan Dialysis Outcomes and Practice Patterns Study (J-DOPPS) phase 3 (2005–2008), and phase 4 (2009–2011) to develop the risk equations and prediction model. For our study, eligible participants were patients aged 18 years or older who had been on maintenance HD for at least 90 days. We excluded subjects with missing data for HD vintage. The J-DOPPS collected demographic information, such as laboratory data, drug information, and dialysis conditions, every four months, and information on hospitalization and death at each occurrence. Our present study using J-DOPPS data complied with the Declaration of Helsinki. All participants in J-DOPPS have provided written informed consent before study enrollment. Data collection was performed in a fashion that maintains patient anonymous at the cording center [20]. This study's conduct was approved by the Ethics Committee of Tokyo Women's Medical University (Approval Numbers 709, 1178, 1278, 1527, 1826, and 2143).

### Candidate predictors

We included both FRS risk factors and several HD-specific risk factors identified in previous studies as candidate predictors. The FRS risk factors were age, diabetes mellitus, smoking habit, fifth Joint National Committee blood pressure category, National Cholesterol Education Program TC (or LDL-C), and HDL-C by gender. The HD-specific risk factors included dialysis vintage, time on dialysis per week, vascular access type, Kt/v, BMI and laboratory data (levels of hemoglobin [Hb], calcium, phosphate, intact parathyroid hormone [iPTH], and albumin).

### Main outcome

The primary outcome was the incidence of composite cardiovascular events, including major adverse cardiovascular events, including hospitalization due to unstable or stable angina or non-fatal myocardial infarction, and all-cause death in one year. We also included all-cause death as a composite outcome. While substance causes of death among hemodialysis patients were related to heart disease, such as heart failure and ischemic heart diseases [21], we did not report these deaths due to a lack of inquiry [22].

### Statistical analyses

With regard to baseline characteristics of participants, continuous data with normal distribution were summarized as means (standard deviation [SD]), continuous variables with skewed data as medians (inter-quartile range [IQR]), and categorical data as proportions.

We used multivariable logistic regression with backward stepwise selection to develop the prediction model [23–25]. We first performed multiple imputation for complementation of missing variables, deriving all candidate predictors. Second, we conducted our analysis using multivariable logistic regression for the full model with imputed values and performed backward elimination of the least significant predictor in order. We stopped regression once the *p*-value for all predictors was less than 0.10 and then completed our new model. Third, we assigned integer scores to selected predictors based on the beta coefficient from the completed model. The discrimination ability of the model was evaluated based on the *c*-statistic (area under the receiver operating characteristic [ROC] curve) [26–29]. We also compared the *c*-statistics of the new model to that of the FRS. The consistency between the incidence predicted by the new model and the incidence observed of composite CV events was assessed using a calibration plot. Additionally, we calculated the sum of the risk scores and compared the results

with each model to the actually observed incidence of composite CV events, separating the values into quartiles of grades 1 to 4. We conducted bootstrapping with 1000 resamples to assess the internal validation and performed Rubin’s rule on summary estimates to combine all results from multiple imputed datasets. All statistical analyses were performed using STATA 14.0 (version 14.0; Stata Corp, College Station, TX, USA) software, with 2-sided significance set at 0.05. We followed the TRIPOD statement for reporting [30].

## Results

### Study flow diagram

A total of 121 facilities and 4,967 HD patients were included in J-DOPPS phases 3 to 4. Fig 1 shows the participant flow diagram and the process of study selection. After excluding 681 patients for being less than 90 days from initiation of HD and 47 for missing vintage values, 4,239 patients remained in this study at baseline. Within 1 year, 638 patients were censored for reasons other than the primary outcome, such as transfer to another hospital, leaving 3,601 patients ultimately included in the analysis of this study.

### Description of candidate predictors and incidence of composite CV events in the new risk model

The candidate predictors are shown in Table 1. Mean age was 63.7 years, 61.8% of subjects were men, 36.2% had history of CV events, 33.7% had history of diabetes, and the median dialysis vintage was 3.6 years. A total of 328 (9.1%) composite CV events occurred in the year

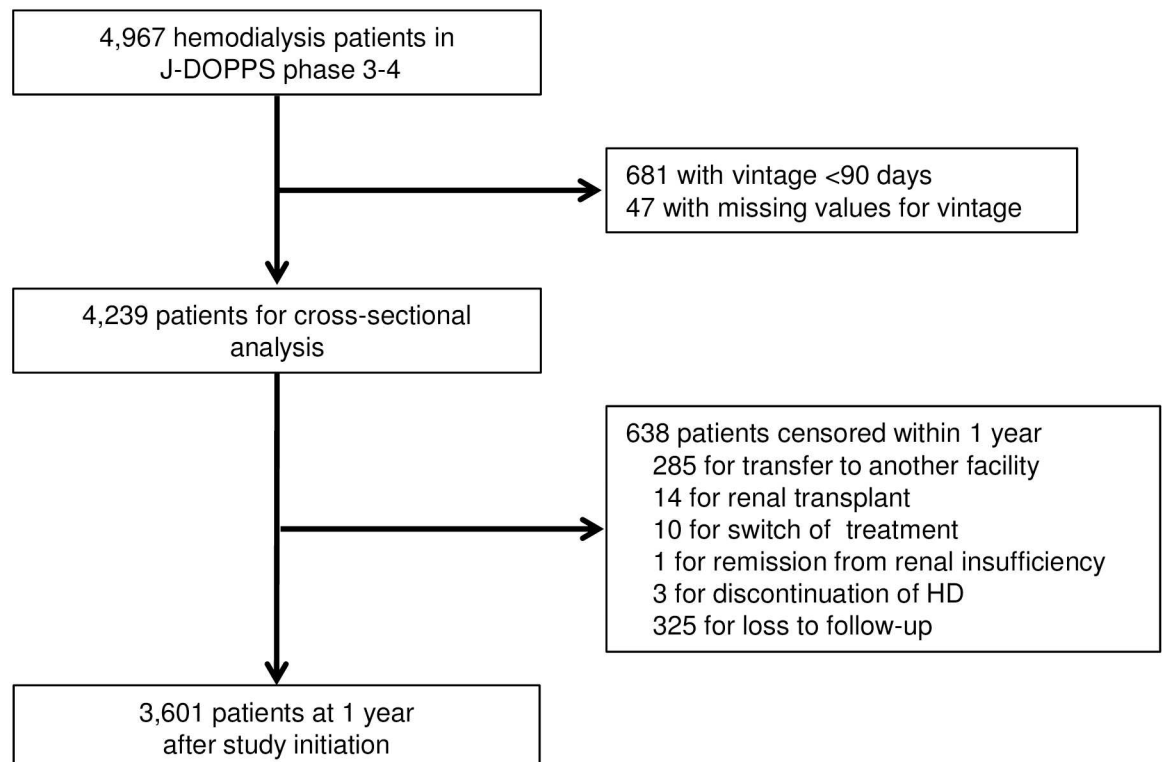

**Fig 1. Participant flow diagram and study selection process.**

doi:10.1371/journal.pone.0173468.g001

**Table 1. Baseline characteristics of patients.**

| Characteristics                              | Total (n = 3,601) | Number missing |
|----------------------------------------------|-------------------|----------------|
| Age, years                                   | 63.7 (12.3)       | 5              |
| Men, %                                       | 61.8              | 2              |
| Smoker (ever), %                             | 14.2              | 432            |
| Diabetes, %                                  | 33.7              | 299            |
| History of CV events, %                      | 36.2              | 268            |
| Pre-dialysis systolic blood pressure, mmHg   | 150.5 (22.6)      | 317            |
| Pre-dialysis diastolic blood pressure, mmHg  | 77.8 (13.6)       | 322            |
| Dialysis time <720 min/week, %               | 23.5              | 484            |
| Vintage, years                               | 3.5 (1.2)         | 0              |
| Vascular access type, %                      |                   | 748            |
| <i>AV fistula</i>                            | 91.7              |                |
| <i>Graft</i>                                 | 7.8               |                |
| <i>Catheter</i>                              | 0.42              |                |
| <i>Kt/v</i>                                  | 1.4 (0.27)        |                |
| Laboratory variables                         |                   |                |
| <i>Total cholesterol, mg/dL</i>              | 155.1 (35.4)      | 885            |
| <i>High-density lipid cholesterol, mg/dL</i> | 46.8 (17.1)       | 1,693          |
| <i>Hemoglobin, g/dL</i>                      | 10.4 (1.2)        | 309            |
| <i>Calcium, mg/dL</i>                        | 9.3 (0.83)        | 488            |
| <i>Phosphorus, mg/dL</i>                     | 5.5 (1.4)         | 303            |
| <i>Intact parathyroid hormone, pg/L</i>      | 137 (69–236)      | 1,104          |
| <i>Albumin, g/dL</i>                         | 3.8 (0.42)        | 409            |

Continuous data with normal distribution were summarized as mean ( $\pm$ standard deviation), continuous variables with skewed data were summarized as median (interquartile range), and dichotomous or categorical data were summarized as proportions.

doi:10.1371/journal.pone.0173468.t001

following study initiation (S1 Table). Men had more outcomes (219 of 2,225 [9.8%]) than women (108 of 1,374 [7.9%]).

### Derivation of new risk model

We included 17 candidate predictors in our initial model, and the final model ultimately contained only six variables: age, diabetes mellitus status, history of CV events, dialysis time per session, phosphorus level, and albumin level. Beta coefficients of each predictor are shown in Table 2, and scores of selected predictors were assigned an integer score based on the beta coefficient. The smallest beta coefficient that indicated a p value of less than 0.1 in the new risk model was 0.29, which was equivalent to 1 point, and total score ranged from 0 to 20 points.

### New model assessment and comparison with the Framingham model

We assessed the discrimination ability of the new model using an area under ROC curve (c-statistics: 0.76, 95% CI: 0.73 to 0.78; S1 Appendix) and compared the new model with the Framingham model. ROC curves were compared by sex between our model and the FRS. C-statistics in our new model were significantly higher than in the Framingham model for both men (c-statistics: 0.75, 95% confidence interval [CI]: 0.71–0.78 for new model; 0.64, 95% CI: 0.60–0.68 for FRS model) and women (c-statistics: 0.77, 95% CI: 0.73–0.82 for new model; 0.57, 95% CI: 0.52–0.62 for FRS model; Fig 2).

**Table 2. Adjusted odds ratios for association between predictors of incidences of composite cardiovascular events (final step of predictor selection).**

| Characteristics                | beta | OR (95% CI)       | p value | Score |
|--------------------------------|------|-------------------|---------|-------|
| <b>Age, years</b>              |      |                   |         |       |
| <55                            |      | Reference         |         | 0     |
| 55–64                          | 0.52 | 1.7 (1.1 to 2.7)  | 0.028   | 2     |
| 65–75                          | 0.70 | 2.0 (1.3 to 3.2)  | 0.003   | 2     |
| >75                            | 1.34 | 3.8 (2.4 to 6.1)  | < 0.001 | 5     |
| Diabetes, %                    | 0.68 | 2.0 (1.5 to 2.6)  | < 0.001 | 2     |
| History of CV events, %        | 1.01 | 2.7 (2.1 to 3.5)  | < 0.001 | 3     |
| Dialysis time <720 min/week, % | 0.46 | 1.6 (1.2 to 2.1)  | < 0.001 | 2     |
| <b>Phosphorus, mg/dL</b>       |      |                   |         |       |
| <3.5                           | 0.66 | 1.9 (1.2 to 3.1)  | 0.008   | 2     |
| 3.5 to <6.0                    |      | Reference         |         | 0     |
| ≥6.0                           | 0.29 | 1.3 (1.0 to 1.8)  | 0.045   | 1     |
| <b>Albumin, g/dL</b>           |      |                   |         |       |
| <3.0                           | 1.76 | 5.8 (3.1 to 10.9) | < 0.001 | 6     |
| 3.0 to < 4.0                   | 0.21 | 1.2 (0.91 to 1.7) | 0.18    | 1     |
| ≥4.0                           |      | Reference         |         | 0     |

CI, confidence interval; OR, odds ratio

doi:10.1371/journal.pone.0173468.t002

Fig 3 shows the accuracy of our model by comparing the incidence predicted by the new model with the actual observed incidence of composite CV events using a calibration plot. Additionally, we divided participants into four groups based on risk score quartile (Grades 1 to 4) obtained from the FRS or the new risk model and compared the observed incidences of composite CV events between the FRS and our new model. The FRS in men ranged from -6 to 17 points (Grade 1: -6 to 5 points, Grade 2: 6 to 7 points, Grade 3: 8 to 9 points, and Grade 4: 10 to 17), while that in women ranged from -17 to 23 points (Grade 1: -17 to 7 points, Grade 2: 8 to 11 points, Grade 3: 12 to 14 points, and Grade 4: 15 to 23); the new risk model score in

Fig 2A.

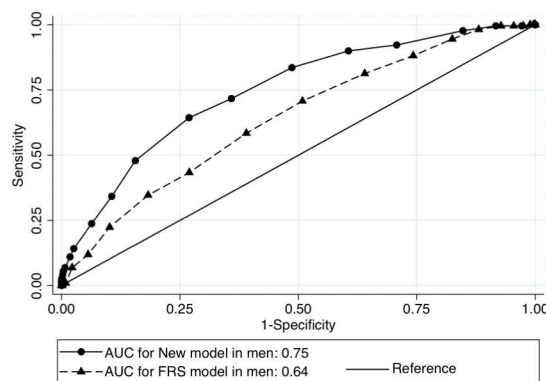

Fig 2B.

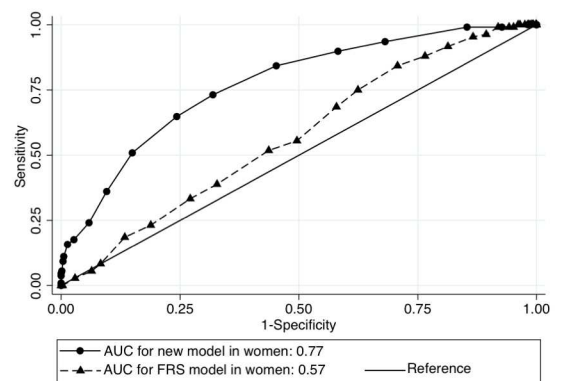

**Fig 2. Comparison discrimination ability of new risk model with Framingham model by gender.** Results described are c-statistics. (A) The comparison between the new model and Framingham model in men (n = 2,224). (B) The comparison in women (n = 1,372). Circles indicate the AUC of the new model, and triangles indicate that of the FRS model.

doi:10.1371/journal.pone.0173468.g002

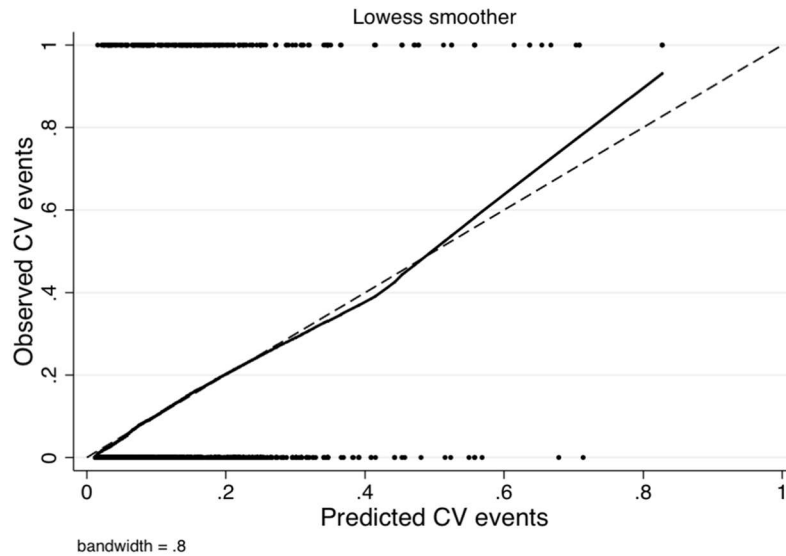

**Fig 3. Calibration plot for new model.** Result shows the consistency between predicted CV events by new model and observed CV events using a calibration plot. The dotted line indicates perfect fitting, and the solid line indicates the predicted probabilities.

doi:10.1371/journal.pone.0173468.g003

both men and women ranged from 0 to 20 points (Grade 1: 0 to 3 points, Grade 2: 4 to 6 points, Grade 3: 7 to 8 points, and Grade 4: 9 to 20 points). The risk score quartiles obtained from the FRS showed no obvious association with the observed incidence of composite CV events (men: Grade 1: 5.4%, Grade 2: 10.2%, Grade 3: 11.1%, and Grade 4: 15.3%; women: Grade 1: 5.5%, Grade 2: 10.1%, Grade 3: 10.2%, and Grade 4: 9.1%), whereas the quartiles obtained from the new model showed a dose-dependent association with the observed incidence of composite CV events (Grade 1: 2.4%, Grade 2: 5.9%, Grade 3: 10.9%, Grade 4: 24.0%) (see Fig 4).

We assessed the internal validation via the bootstrap method and found that the c-statistics were similar between our new model and the modified new model developed using the bootstrap method (c-statistics: 0.75, 95% CI: 0.74 to 0.76 for bootstrap model), and the calibration plot was also similar (S2 Appendix).

## Discussion

In the present study, we developed a new prognostic prediction model of composite CV events tailored for HD patients including HD-specific predictors such as age, diabetes mellitus status, history of CV events, dialysis time per session and phosphate and albumin levels. Our new model had good discrimination and calibration ability in the derivation cohort, and also showed good discrimination and calibration in the bootstrapping cohort. The score obtained using our new model had a more accurate dose-dependent association with observed CV events than the FRS. We therefore believe that our new model will facilitate earlier detection of incidence risk of composite CV events, potentially improving prognosis.

Previous studies have noted that the FRS cannot adequately predict risk of CV events among HD patients [31], even after incorporating HD-specific risk factors such as ankle brachial index [18], metabolic syndrome status, and albuminuria status [19]. Further, several risk factors included in the FRS are not necessarily risk factors for HD patients at all. For example, while high TC and LDL-C levels are reported to be risk factors for CV events in the general population, low TC and LDL-C levels have been implicated in risk of death due to CV events



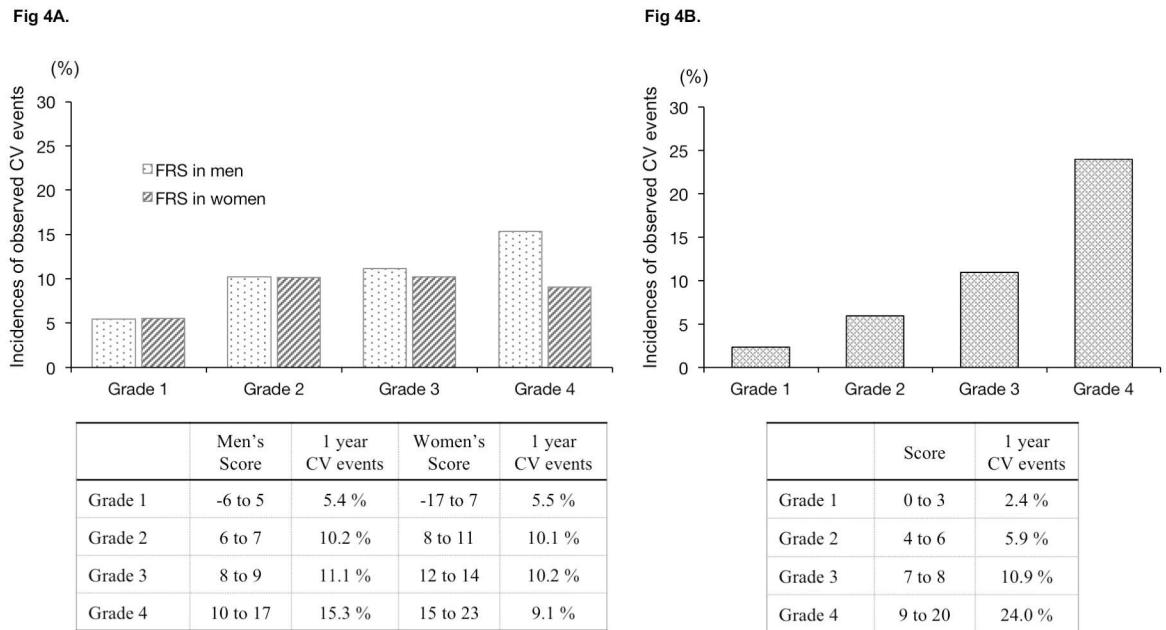

**Fig 4. Risk score and incidence of observed CV events in each model.** Results shows the association between the risk score and observed CV events. Scores were four groups based on risk score quartile (Grade 1 to 4). Fig 4A shows Framingham risk score by gender. Fig 4B shows new risk score.

doi:10.1371/journal.pone.0173468.g004

in HD patients [10,11]. No useful prediction model that comprehensively includes HD-specific risk factors, such as anemia [32–35], malnutrition [16,17,36], and mineral abnormalities [12–14,37] has yet been developed, which have been reported to be strongly correlated with incidence of CV events and mortality in HD patients. Dialysis physicians cannot use FRS because important potential risk factors are not included in the FRS score. More appropriate risk scores are therefore needed to identify hemodialysis patients who experience asymptomatic and untreatable CV events.

Regarding implications for clinical practice, we believe that our new risk model might facilitate more adequate prediction of CV risk, allowing physicians to perform early intervention in asymptomatic HD patients before their condition becomes untreatable. Further, previous studies reported that almost half of HD patients have significant coronary artery stenosis at the time of HD initiation [38–41], a condition which can be exacerbated by dialysis [40]. We therefore believe that more accurate prediction using our new risk model will lead to improved prognosis for a substantial number of HD patients.

Several strengths to the present study warrant mention. First, we developed a novel prognostic prediction model consisting of six exhaustive predictors, including HD-specific risk factors. Our model includes not only age and diabetes mellitus status derived from the FRS, but also history of CV events, dialysis time per session and phosphate and albumin levels as new factors. Second, all of six predictors are commonly measured in most HD facilities, so this new prediction model should be both suitable and easy to use in actual clinical practice. Third, unlike the FRS, our model was developed in a study of patients with history of CV events and those aged over 75 years. Given that a considerable number of HD patients have history or risk of CV events and tend to be older than the general population, this expansion of inclusion criteria is reasonable and improves generalizability [42–44]. Finally, the total number of samples in J-DOPPS was relatively large. All risk factors, including medical history, complications,



laboratory data, drug information, and dialysis conditions, were collected at baseline or every four months. Further, the incidence of CV events as a primary outcome was much higher than in previous studies involving participants without renal impairment. We were therefore able to include multiple predictors in our model.

This study also had several limitations. First, the follow-up period for our model (1 year) was much shorter than that of the FRS (12 years). However, we feel this shorter period was justified given that the average life expectancy for HD patients is markedly shorter than that of the general population, with relatively few surviving more than 10 years even with improvements in HD therapy [45]. Second, missing values were quite frequent for several predictors, such as TC and HDL-C, as shown in Table 1, and we performed multiple imputation to construct the prediction model. However, results before and after multiple imputation were consistent, so we believe that the missing values had no marked effects on our findings. Third, the generalizability of our prediction model for populations of other races may be limited. However, while the incidence of CV events among Japanese is low compared to other races [44], we recognized an association between composite CV events and several predictors included in our model. Further, we consider that as for the risk factors included in new model, there is no significant difference among races. Therefore, we believe that our model will still be relevant in countries with a higher prevalence of CV events than Japan. Finally, we have not assessed the external validation of this model yet. We plan to perform this analysis using data from J-DOPPS phases V and VI, which are in progress.

## Conclusions

We developed new model for predicting risk of CV events in HD patients. Our model, which includes HD-specific factors, may be useful for evidence-based management for risk factors of CV events in HD patients. We believe that this prediction model will be more appropriate than the FRS for HD patients, facilitating earlier therapeutic intervention in this population than is possible at present. In the future, we will continue to validate our model in a larger number of subjects.

## Supporting information

**S1 Appendix. Discrimination ability of new risk model for the incidence of composite CV events in one year after study initiation.**

(PDF)

**S2 Appendix. Internal validation using bootstrap method for new model.**

(PDF)

**S1 Table. Characteristics of main outcome.**

(PDF)

## Acknowledgments

We appreciate the cooperation of the facilities participating in the J-DOPPS.

## Author Contributions

**Conceptualization:** YM MK SFukuma YO SFukuhara.

**Data curation:** MK SFukuma YO.

**Formal analysis:** MK SFukuma YO.

**Investigation:** YM MK SFukuma YO.

**Methodology:** YM MK SFukuma YO SFukuhara.

**Project administration:** YM MK SFukuma YO SFukuhara.

**Resources:** YM MK SFukuma YO SFukuhara.

**Software:** MK SFukuma.

**Supervision:** SFukuma SFukuhara.

**Validation:** YM MK SFukuma.

**Visualization:** YM MK SFukuma.

**Writing – original draft:** YM MK SFukuma.

**Writing – review & editing:** YM MK SFukuma YO SFukuhara.

## References

1. Sumida K, Yamagata K, Iseki K, Tsubakihara Y. Different impact of hemodialysis vintage on cause-specific mortality in long-term hemodialysis patients. *Nephrol Dial Transplant*. 2016; 31: 298–305. doi: [10.1093/ndt/gfv402](https://doi.org/10.1093/ndt/gfv402) PMID: [26666499](https://pubmed.ncbi.nlm.nih.gov/26666499/)
2. Foley RN, Parfrey PS, Sarnak MJ. Epidemiology of cardiovascular disease in chronic renal disease. *J Am Soc Nephrol*. 1998; 9: S16–23.
3. Goodkin DA, Young EW, Kurokawa K, Prütz KG, Levin NW. Mortality among hemodialysis patients in Europe, Japan, and the United States: case-mix effects. *Am J Kidney Dis*. 2004; 44: 16–21. PMID: [15486869](https://pubmed.ncbi.nlm.nih.gov/15486869/)
4. Herzog CA, Asinger RW, Berger AK, Charytan DM, Díez J, Hart RG, et al. Cardiovascular disease in chronic kidney disease. A clinical update from Kidney Disease; Improving Global Outcomes (KDIGO). *Kidney Int*. 2011; 80: 572–86. doi: [10.1038/ki.2011.223](https://doi.org/10.1038/ki.2011.223) PMID: [21750584](https://pubmed.ncbi.nlm.nih.gov/21750584/)
5. K.D.O.Q.I Workgroup. K/DOQI clinical practice guidelines for cardiovascular disease in dialysis patients. *Am J Kidney Dis*. 2005; 45: S1–153.
6. Wilson PW, D'Agostino RB, Levy D, Belanger AM, Silbershatz H, Kannel WB. Prediction of coronary heart disease using risk factor categories. *Circulation*. 1998; 97:1837–47. PMID: [9603539](https://pubmed.ncbi.nlm.nih.gov/9603539/)
7. Grundy SM, Pasternak R, Greenland P, Smith S Jr, Fuster V. Assessment of cardiovascular risk by use of multiple-risk-factor assessment equations: A statement for healthcare professionals from the American Heart Association and the American College of Cardiology. *Circulation*. 1999; 100: 1481–92. PMID: [10500053](https://pubmed.ncbi.nlm.nih.gov/10500053/)
8. Brindle P, Beswick A, Fahey T, Ebrahim S. Accuracy and impact of risk assessment in the primary prevention of cardiovascular disease: a systematic review. *Heart*. 2006; 92: 1752–9. doi: [10.1136/hrt.2006.087932](https://doi.org/10.1136/hrt.2006.087932) PMID: [16621883](https://pubmed.ncbi.nlm.nih.gov/16621883/)
9. Okwuosa TM, Greenland P, Ning H, Liu K, Bild DE, Burke GL, et al. Distribution of coronary artery calcium scores by Framingham 10-year risk strata in the MESA (Multi-Ethnic Study of Atherosclerosis) potential implications for coronary risk assessment. *J Am Coll Cardiol*. 2011; 57:1838–45. doi: [10.1016/j.jacc.2010.11.053](https://doi.org/10.1016/j.jacc.2010.11.053) PMID: [21527159](https://pubmed.ncbi.nlm.nih.gov/21527159/)
10. Degoulet P, Legrain M, Réach I, Aimé F, Devriés C, Rojas P, et al. Mortality risk factors in patients treated by chronic hemodialysis. Report of the Diaphane collaborative study. *Nephron*. 1982; 31:103–10. PMID: [7121651](https://pubmed.ncbi.nlm.nih.gov/7121651/)
11. Shoji T, Masakane I, Watanabe Y, Iseki K, Tsubakihara Y. Committee of Renal Data Registry, Japanese Society for Dialysis Therapy. Elevated non-high-density lipoprotein cholesterol (non-HDL-C) predicts atherosclerotic cardiovascular events in hemodialysis patients. *Clin J Am Soc Nephrol*. 2011; 6: 1112–20. doi: [10.2215/CJN.09961110](https://doi.org/10.2215/CJN.09961110) PMID: [21511840](https://pubmed.ncbi.nlm.nih.gov/21511840/)
12. Young EW, Albert JM, Satayathum S, Goodkin DA, Pisoni RL, Akiba T, et al. Predictors and consequences of altered mineral metabolism: the Dialysis Outcomes and Practice Patterns Study. *Kidney Int*. 2005; 67: 1179–87. doi: [10.1111/j.1523-1755.2005.00185.x](https://doi.org/10.1111/j.1523-1755.2005.00185.x) PMID: [15698460](https://pubmed.ncbi.nlm.nih.gov/15698460/)
13. Palmer SC, Hayen A, Macaskill P, Pellegrini F, Craig JC, Elder GJ, et al. Serum levels of phosphorus, parathyroid hormone, and calcium and risks of death and cardiovascular disease in individuals with

- chronic kidney disease: a systematic review and meta-analysis. *JAMA*. 305: 1119–27, 2011. doi: [10.1001/jama.2011.308](https://doi.org/10.1001/jama.2011.308) PMID: [21406649](https://pubmed.ncbi.nlm.nih.gov/21406649/)
14. Tentori F, Blayney MJ, Albert JM, Gillespie BW, Kerr PG, Bommer J, et al. Mortality risk for dialysis patients with different levels of serum calcium, phosphorus, and PTH: the Dialysis Outcomes and Practice Patterns Study (DOPPS). *Am J Kidney Dis*. 2008; 52: 519–30. doi: [10.1053/j.ajkd.2008.03.020](https://doi.org/10.1053/j.ajkd.2008.03.020) PMID: [18514987](https://pubmed.ncbi.nlm.nih.gov/18514987/)
  15. Frank H, Heusser K, Höffken B, Huber P, Schmieder RE, Schobel HP. Effect of erythropoietin on cardiovascular prognosis parameters in hemodialysis patients. *Kidney Int*. 2004; 66: 832–40. doi: [10.1111/j.1523-1755.2004.00810.x](https://doi.org/10.1111/j.1523-1755.2004.00810.x) PMID: [15253740](https://pubmed.ncbi.nlm.nih.gov/15253740/)
  16. Jialin W, Yi Z, Weijie Y. Relationship between body mass index and mortality in hemodialysis patients: a meta-analysis. *Nephron Clin Pract*. 2012; 121: c102–11.
  17. Beddhu S, Pappas LM, Ramkumar N, Samore MH. Malnutrition and atherosclerosis in dialysis patients. *J Am Soc Nephrol*. 2004; 15: 733–42. PMID: [14978176](https://pubmed.ncbi.nlm.nih.gov/14978176/)
  18. Huang JC, Chen SC, Su HM, Chang JM, Hwang SJ, Chen HC. Performance of the Framingham risk score in patients receiving hemodialysis. *Nephrology (Carlton)*. 2013; 18: 510–5.
  19. Huang JC, Chen SC, Lin MY, Chang JM, Hwang SJ, Tsai JC, et al. Association of relatives of hemodialysis patients with metabolic syndrome, albuminuria and Framingham Risk Score. *PLoS One*. 2014; 9: e96362. doi: [10.1371/journal.pone.0096362](https://doi.org/10.1371/journal.pone.0096362) PMID: [24804770](https://pubmed.ncbi.nlm.nih.gov/24804770/)
  20. Young EW, Goodkin DA, Mapes DL, Port FK, Keen ML, Chen K, et al. The Dialysis Outcomes and Practice Patterns Study (DOPPS): An international hemodialysis study. *Kidney Int*. 2000; 57: S74–81. <http://org/10.1046/j.1523-1755.2000.07413.x>
  21. Go AS, Chertow GM, Fan D, McCulloch CE, Hsu CY. Chronic kidney disease and the risks of death, cardiovascular events, and hospitalization. *N Engl J Med*. 2004; 351: 1296–305. doi: [10.1056/NEJMoa041031](https://doi.org/10.1056/NEJMoa041031) PMID: [15385656](https://pubmed.ncbi.nlm.nih.gov/15385656/)
  22. Cavanaugh KL, Merkin SS, Plantinga LC, Fink NE, Sadler JH, Powe NR. Accuracy of patients' reports of comorbid disease and their association with mortality in ESRD. *Am J Kidney Dis*. 2008; 52: 118–27. doi: [10.1053/j.ajkd.2008.02.001](https://doi.org/10.1053/j.ajkd.2008.02.001) PMID: [18589216](https://pubmed.ncbi.nlm.nih.gov/18589216/)
  23. McGinn TG, Guyatt GH, Wyer PC, Naylor CD, Stiell IG, Richardson WS. Users' guides to the medical literature: XXII: how to use articles about clinical decision rules. Evidence-Based Medicine Working Group. *JAMA*. 2000; 284: 79–84. PMID: [10872017](https://pubmed.ncbi.nlm.nih.gov/10872017/)
  24. Laupacis A, Sekar N, Stiell I. Clinical prediction rules: a review and suggested modifications of methodological standards. *JAMA*. 1997; 277: 488–94. PMID: [9020274](https://pubmed.ncbi.nlm.nih.gov/9020274/)
  25. Kottner JA. Diagnosis prediction rules: principles, requirements and pitfalls. *Prim Care*. 1995; 22: 341–63. PMID: [7617791](https://pubmed.ncbi.nlm.nih.gov/7617791/)
  26. Steyerberg EW, Eijkemans MJ, Boersma E, Habbema JD. Equally valid models gave divergent predictions for mortality in acute myocardial infarction patients in a comparison of logistic regression models. *J Clin Epidemiol*. 2005; 58: 389–90.
  27. Steyerberg EW, Eijkemans MJ, Boersma E, Habbema JD. Applicability of clinical prediction models in acute myocardial infarction: a comparison of traditional and empirical Bayes adjustment methods. *Am Heart J*. 2005; 150: 920.
  28. Harrell FE Jr, Lee KL, Mark DB. Multivariable prognostic models: issues in developing models, evaluating assumptions and adequacy, and measuring and reducing errors. *Stat Med*. 1996; 15: 361–87. doi: [10.1002/\(SICI\)1097-0258\(19960229\)15:4<361::AID-SIM168>3.0.CO;2-4](https://doi.org/10.1002/(SICI)1097-0258(19960229)15:4<361::AID-SIM168>3.0.CO;2-4) PMID: [8668867](https://pubmed.ncbi.nlm.nih.gov/8668867/)
  29. Steyerberg EW, Eijkemans MJ, Habbema JD. Stepwise selection in small data sets: a simulation study of bias in logistic regression analysis. *J Clin Epidemiol*. 1999; 52: 935–42. PMID: [10513756](https://pubmed.ncbi.nlm.nih.gov/10513756/)
  30. Collins GS, Reitsma JB, Altman DG, Moons KG. Transparent Reporting of a multivariable prediction model for Individual Prognosis or Diagnosis (TRIPOD): The TRIPOD Statement. *Ann Intern Med*. 2015; 162: 55–63. doi: [10.7326/M14-0697](https://doi.org/10.7326/M14-0697) PMID: [25560714](https://pubmed.ncbi.nlm.nih.gov/25560714/)
  31. Floege J, Gillespie IA, Kronenberg F, Anker SD, Gioni I, Richards S, et al. Development and validation of a predictive mortality risk score from a European hemodialysis cohort. *Kidney Int*. 2015 May; 87(5):996–1008. doi: [10.1038/ki.2014.419](https://doi.org/10.1038/ki.2014.419) PMID: [25651366](https://pubmed.ncbi.nlm.nih.gov/25651366/)
  32. Iaina A, Silverberg DS, Wexler D. Therapy insight: congestive heart failure, chronic kidney disease and anemia, the cardio-renal-anemia syndrome. *Nat Clin Pract Cardiovasc Med*. 2005; 2: 95–100. doi: [10.1038/ncpcardio0094](https://doi.org/10.1038/ncpcardio0094) PMID: [16265380](https://pubmed.ncbi.nlm.nih.gov/16265380/)
  33. Silverberg DS, Wexler D, Blum M, Tchekiner JZ, Sheps D, Keren G, et al. The effect of correction of anaemia in diabetics and non-diabetics with severe resistant congestive heart failure and chronic renal failure by subcutaneous erythropoietin and intravenous iron. *Nephrol Dial Transplant*. 2003; 18:141–6. PMID: [12480972](https://pubmed.ncbi.nlm.nih.gov/12480972/)

34. Silverberg DS, Wexler D, Blum M, Schwartz D, Wollman Y, Iaina A. Erythropoietin should be part of congestive heart failure management. *Kidney Int.* 2003; Suppl (87): S40–7.
35. Jurkovicz C, Abramson J, McClellan WM. Anemia and cardiovascular and kidney disease. *Curr Opin Nephrol Hypertens.* 2006; 15: 117–22. doi: [10.1097/01.mnh.0000214769.11609.2d](https://doi.org/10.1097/01.mnh.0000214769.11609.2d) PMID: [16481876](https://pubmed.ncbi.nlm.nih.gov/16481876/)
36. Akdag I, Yilmaz Y, Kahvecioglu S, Bolca N, Ercan I, Ersoy A, et al. Clinical value of the malnutrition-inflammation-atherosclerosis syndrome for long-term prediction of cardiovascular mortality in patients with end-stage renal disease: a 5-year prospective study. *Nephrol Clin Pract.* 2008; 108: c99–105.
37. Block GA, Klassen PS, Lazarus JM, Ofsthun N, Lowrie EG, Chertow GM. Mineral metabolism, mortality, and morbidity in maintenance hemodialysis. *J Am Soc Nephrol.* 2004; 15: 2208–18. <http://10.1097/01.ASN.0000133041.27682.A2> PMID: [15284307](https://pubmed.ncbi.nlm.nih.gov/15284307/)
38. Stack AG, Bloembergen WE. Prevalence and clinical correlates of coronary artery disease among new dialysis patients in the United States: a cross-sectional study. *J Am Soc Nephrol.* 2001; 12: 1516–23. PMID: [11423581](https://pubmed.ncbi.nlm.nih.gov/11423581/)
39. Ohtake T, Kobayashi S, Moriya H, Negishi K, Okamoto K, Maesato K, et al. High prevalence of occult coronary artery stenosis in patients with chronic kidney disease at the initiation of renal replacement therapy: an angiographic examination. *J Am Soc Nephrol.* 2005; 16: 1141–8. <http://10.1681/ASN.2004090765> PMID: [15743997](https://pubmed.ncbi.nlm.nih.gov/15743997/)
40. Joki N, Hase H, Nakamura R, Yamaguchi T. Onset of coronary artery disease prior to initiation of haemodialysis in patients with end-stage renal disease. *Nephrol Dial Transplant.* 1997; 12: 718–23. PMID: [9141000](https://pubmed.ncbi.nlm.nih.gov/9141000/)
41. Lindner A, Charra B, Sherrard DJ, Scribner BH. Accelerated atherosclerosis in prolonged maintenance hemodialysis. *N Engl J Med.* 1974; 290: 697–701. doi: [10.1056/NEJM197403282901301](https://doi.org/10.1056/NEJM197403282901301) PMID: [4813742](https://pubmed.ncbi.nlm.nih.gov/4813742/)
42. Johansen KL. The Frail Dialysis Population: A Growing Burden for the Dialysis Community. *Blood Purif.* 2015; 40: 288–92. doi: [10.1159/000441575](https://doi.org/10.1159/000441575) PMID: [26656296](https://pubmed.ncbi.nlm.nih.gov/26656296/)
43. Murtagh FE, Marsh JE, Donohoe P, Ekbal NJ, Sheerin NS, Harris FE. Dialysis or not? A comparative survival study of patients over 75 years with chronic kidney disease stage 5. *Nephron Dial Transplant.* 2007; 22: 1955–62.
44. Canaud B, Tong L, Tentori F, Akiba T, Karaboyas A, Gillespie B, et al. Clinical practices and outcomes in elderly hemodialysis patients: results from the Dialysis Outcomes and Practice Patterns Study (DOPPS). *Clin J Am Soc Nephrol.* 2011; 6: 1651–62. <http://10.2215/CJN.03530410> PMID: [21734085](https://pubmed.ncbi.nlm.nih.gov/21734085/)
45. Goodkin DA, Bragg-Gresham JL, Koenig KG, Wolfe RA, Akiba T, Andreucci VE, et al. Association of comorbid conditions and mortality in hemodialysis patients in Europe, Japan, and the United States: the Dialysis Outcomes and Practice Patterns Study (DOPPS). *Clin J Am Soc Nephrol.* 2003; 14: 3270–7.
