# Supplementary material for: Development of a new risk model for predicting cardiovascular events among hemodialysis patients: Population-based hemodialysis patients from the Japan Dialysis Outcome and Practice Patterns Study (J-DOPPS)
Source: PubMed Central journal article supplement (PMC5342257; doi:10.1371/journal.pone.0173468), 2017-03-08
Supplement: pone.0173468.s002.pdf [file pone.0173468.s002.pdf]

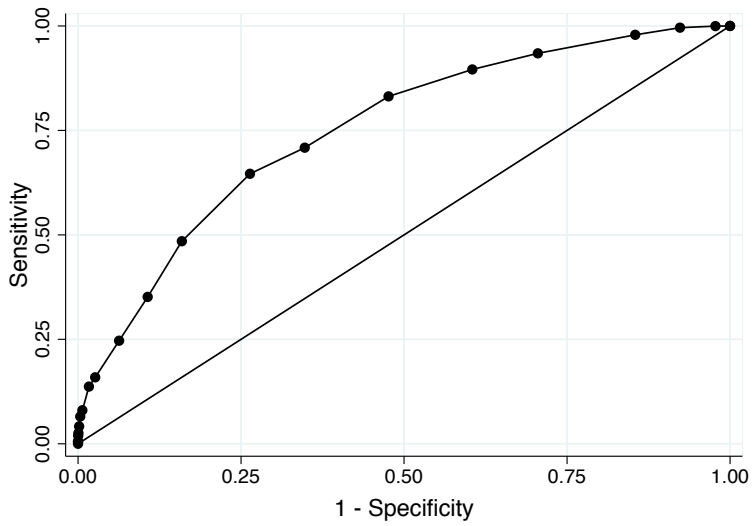

AUC for New model using bootstrap method = 0.75

**S2A.**

**S2 Appendix.**

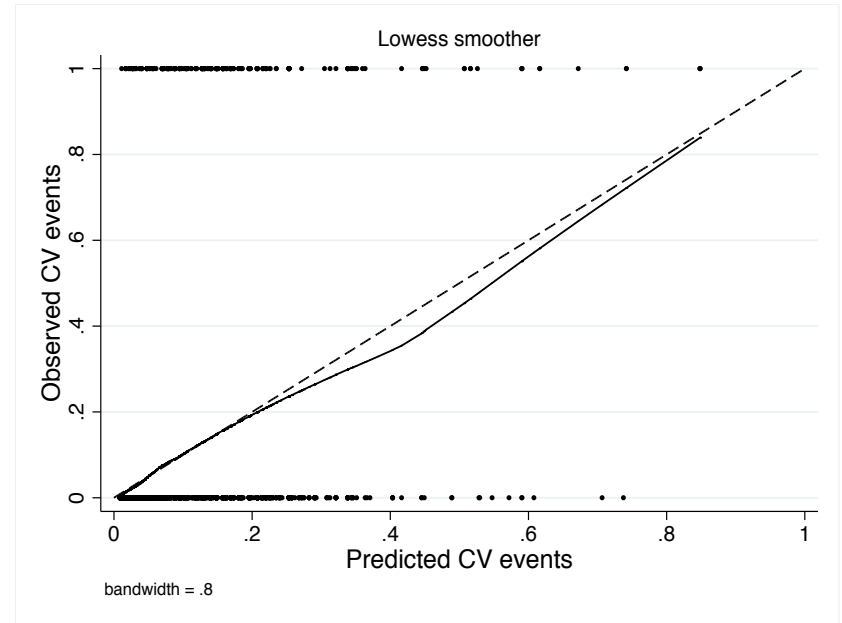

**S2B.**
